# Supplementary material
Source: Springer Nature journal article supplement (https://www.springermedizin.de/resource/supplementary/12967_2009_446_MOESM7_ESM.pdf/9576552)

**A**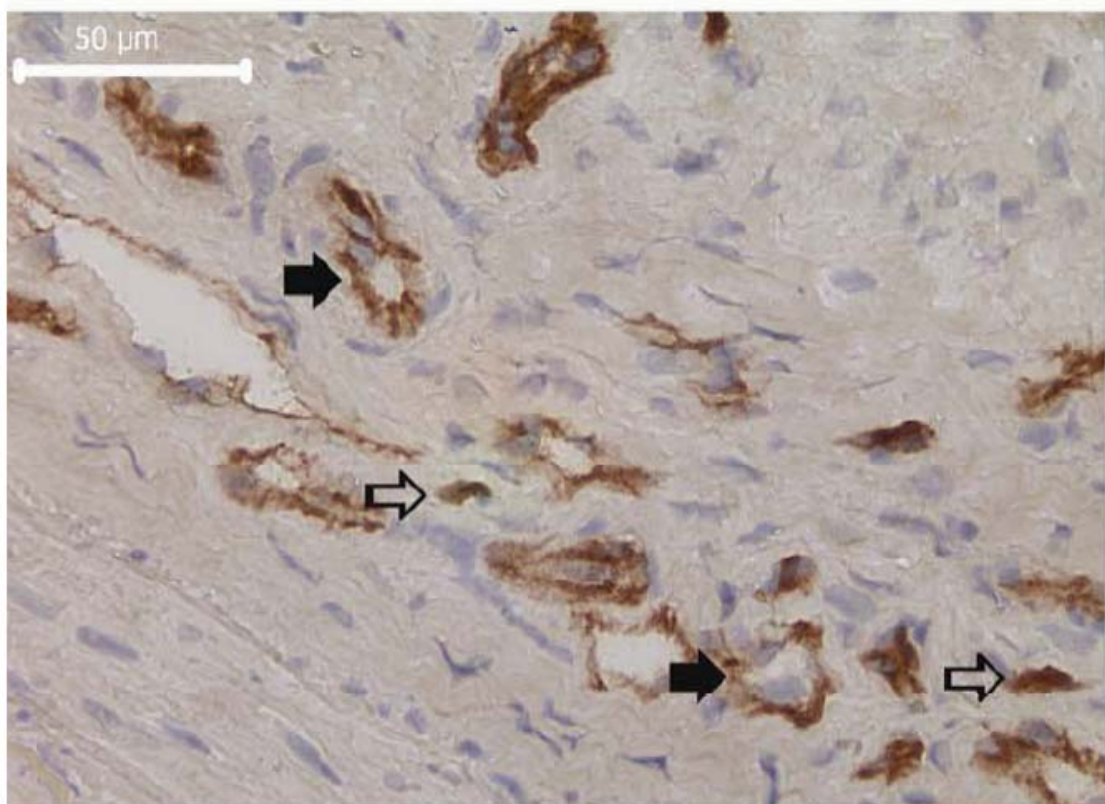**B**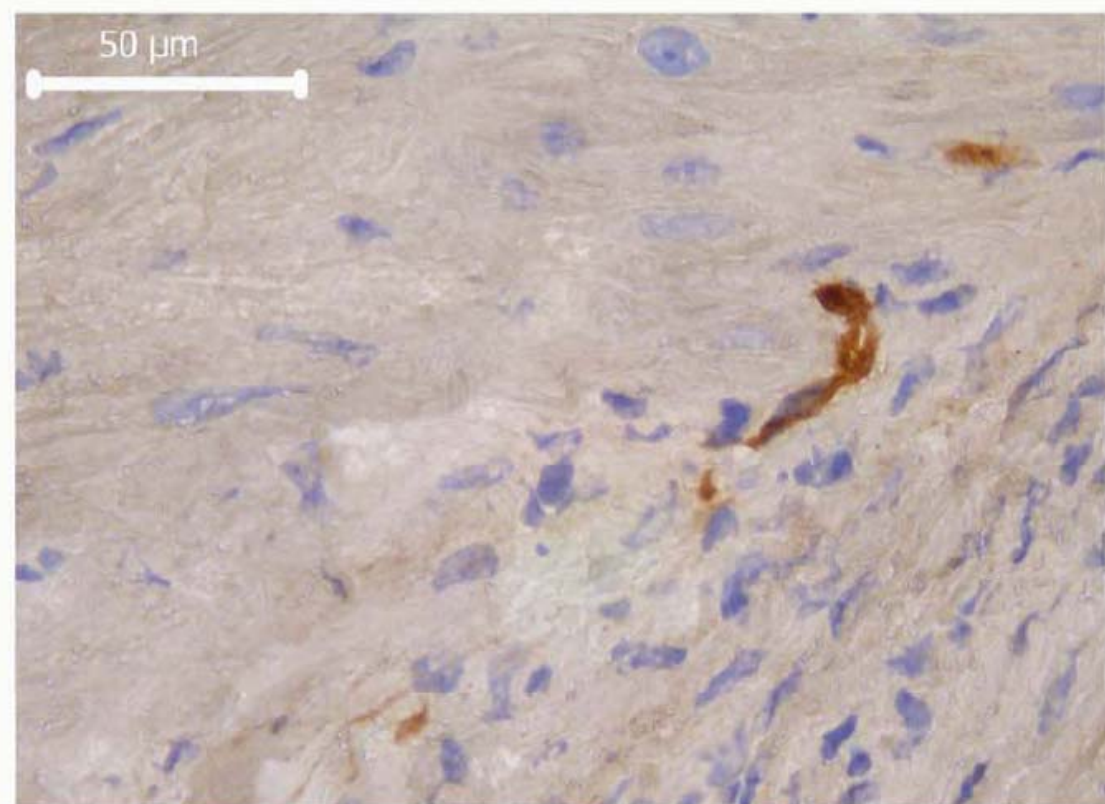

Supplement: MOESM7 [file 9576552]
